# Supplementary material
Source: Springer Nature journal article supplement (https://www.springermedizin.de/resource/supplementary/12895_2012_134_MOESM2_ESM.pdf/9514196)
Supplement: MOESM2 [file 9514196]

| Time line             | HealthySkin Clinic                                  | Control Group             |
|-----------------------|-----------------------------------------------------|---------------------------|
| Baseline (time 0)     |                                                     | <p>(A)</p> <p>(B)</p>     |
| Randomisation         |                                                     |                           |
| Time 0                | <p>(C) (D) (E) (F)</p>                              | <p>(C) (G)</p>            |
| Non-fixed time events | <p>(H) (I)</p> <p>(A)</p> <p>(J) (K)</p> <p>(L)</p> | <p>(H) (I)</p> <p>(A)</p> |
| 6 months              |                                                     | <p>(B) (C)</p>            |

|     |                                                                                                     |
|-----|-----------------------------------------------------------------------------------------------------|
| (A) | Medical consultation(s)                                                                             |
| (B) | HECSI-scoring performed by a member of the intervention team                                        |
| (C) | Questionnaire to gather information of outcome variables                                            |
| (D) | Clinical photo of hand eczema                                                                       |
| (E) | Basic skin protection counselling                                                                   |
| (F) | Self management book (physical or virtual) handed to patient                                        |
| (G) | DVD 'Hand eczema – prevention and treatment of hand eczema' of 14 minutes duration given to patient |
| (H) | Allergen patch testing                                                                              |
| (I) | Written information sheets handed to patient when attending medical consultation(s)                 |
| (J) | SKIN-profile generated from baseline questionnaire                                                  |
| (K) | Nurse-led consultation with individualised counselling based upon SKIN-profile                      |
| (L) | Support offered as telephone hotline, asynchronous website consultation, and patient dialogue forum |
